# Supplementary figures and images for: A Retrospective Cohort Study of the Potency of lipid-lowering therapy and Race-gender Differences in LDL cholesterol control
Source: Springer Nature journal article supplement (doi:10.1186/1471-2261-11-58), 2011-09-30

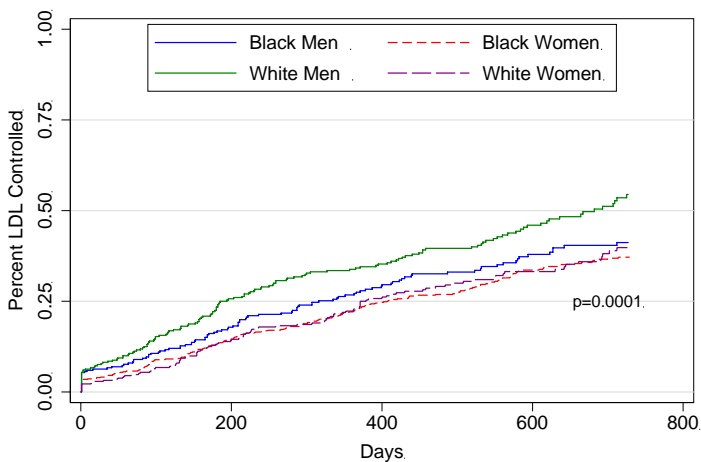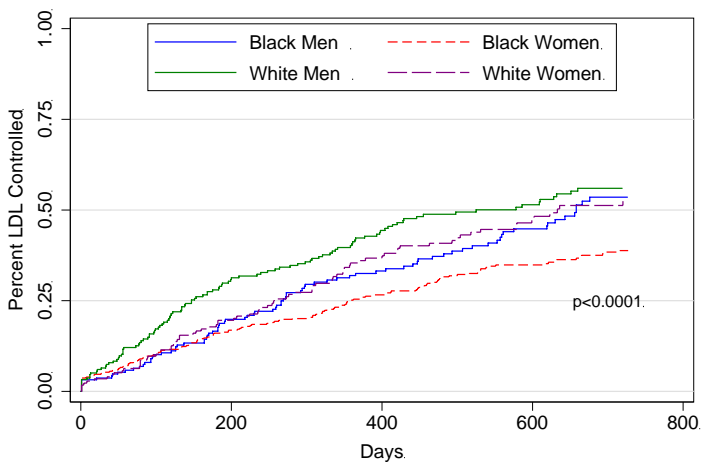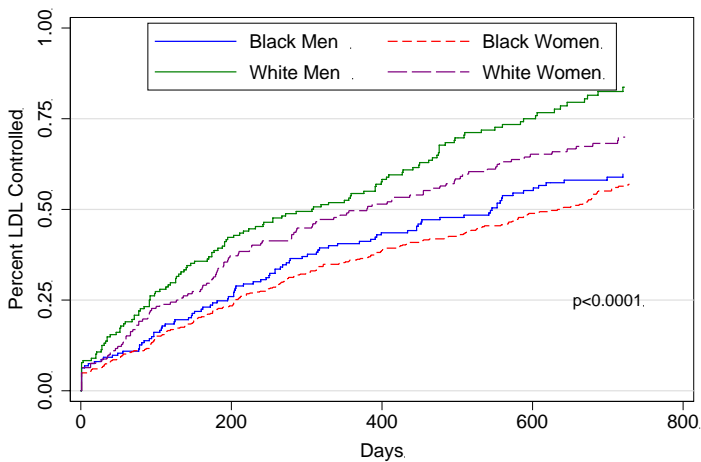

Supplement: 12872_2010_395_MOESM5_ESM.pdf [file 12872_2010_395_MOESM5_ESM.pdf]
